# Supplementary material for: Massively Parallel DNA Sequencing Successfully Identifies New Causative Mutations in Deafness Genes in Patients with Cochlear Implantation and EAS
Source: PubMed Central journal article supplement (PMC3794008; doi:10.1371/journal.pone.0075793), 2013-10-09
Supplement: pone.0075793.s001.pdf [file pone.0075793.s001.pdf]

**Supplementary Table S1. 58 deafness-causative genes.**

| <b>No</b> | <b>Locus Symbol</b> | <b>Gene Symbol</b> | <b>Gene ID</b> | <b>Transcript Variant</b>                    |
|-----------|---------------------|--------------------|----------------|----------------------------------------------|
| 1         | DFNA1               | <i>DIAPH1</i>      | NM_005219      | NM_001079812                                 |
| 2         | DFNA2               | <i>KCNQ4</i>       | NM_004700      | NM_172163                                    |
| 3         | DFNA2               | <i>GJB3</i>        | NM_024009      | NM_001005752                                 |
| 4         | DFNA3               | <i>GJB6</i>        | NM_006783      | NM_001110219<br>NM_001110220<br>NM_001110221 |
| 5         | DFNA4               | <i>MYH14</i>       | NM_024729      | NM_001145809<br>NM_001077186                 |
| 6         | DFNA5               | <i>DFNA5</i>       | NM_004403      | NM_001127454<br>NM_001127453                 |
| 7         | DFNA6/14/38         | <i>WFS1</i>        | NM_006005      | NM_001145853                                 |
| 8         | DFNA8/12/DFNB21     | <i>TECTA</i>       | NM_005422      | -                                            |
| 9         | DFNA9/31            | <i>COCH</i>        | NM_004086      | NM_001135058                                 |
| 10        | DFNA10              | <i>EYA4</i>        | NM_004100      | NM_172103<br>NM_172105                       |
| 11        | DFNA11/DFNB2/USH1B  | <i>MYO7A</i>       | NM_000260      | NM_001127179<br>NM_001127180                 |
| 12        | DFNA13/DFNB53/STL3  | <i>COL11A2</i>     | NM_080680      | NM_080679<br>NM_080681<br>NM_001163771       |
| 13        | DFNA15              | <i>POU4F3</i>      | NM_002700      | -                                            |
| 14        | DFNA17              | <i>MYH9</i>        | NM_002473      | -                                            |
| 15        | DFNA20/DFNA26       | <i>ACTG1</i>       | NM_001614      | NM_001199954                                 |
| 16        | DFNA22/DFNB37       | <i>MYO6</i>        | NM_004999      | -                                            |
| 17        | DFNA25              | <i>SLC17A8</i>     | NM_139319      | NM_001145288                                 |
| 18        | DFNA28              | <i>GRHL2</i>       | NM_024915      | -                                            |
| 19        | DFNA36/DFNB7/11     | <i>TMC1</i>        | NM_138691      | -                                            |
| 20        | DFNA40              | <i>CRYM</i>        | NM_001888      | NM_001014444                                 |
| 21        | DFNA44              | <i>CCDC50</i>      | NM_178335      | NM_174908                                    |
| 22        | DFNA48              | <i>MYO1A</i>       | NM_005379      | -                                            |

|    |               |                 |              |                                                                                                           |
|----|---------------|-----------------|--------------|-----------------------------------------------------------------------------------------------------------|
| 23 | DFNA51        | <i>TJP2</i>     | NM_001170414 | NM_004817<br>NM_201629<br>NM_001170630<br>NM_001170415<br>NM_001170416                                    |
| 24 | DFNA64        | <i>DIABLO</i>   | NM_019887    | NM_138929                                                                                                 |
| 25 |               | <i>CEACAM16</i> | NM_001039213 | -                                                                                                         |
| 26 | DFNB1/DFNA3   | <i>GJB2</i>     | NM_004004    | -                                                                                                         |
| 27 | DFNB3         | <i>MYO15A</i>   | NM_016239    | -                                                                                                         |
| 28 | DFNB4/Pendred | <i>SLC26A4</i>  | NM_000441    | -                                                                                                         |
| 29 | DFNB6         | <i>TMIE</i>     | NM_147196    | -                                                                                                         |
| 30 | DFNB8/10      | <i>TMPRSS3</i>  | NM_024022    | NM_032405                                                                                                 |
| 31 | DFNB9         | <i>OTOF</i>     | NM_194248    | NM_194322<br>NM_194323<br>NM_004802                                                                       |
| 32 | DFNB12/USH1D  | <i>CDH23</i>    | NM_022124    | NM_001171930<br>NM_001171931<br>NM_001171932<br>NM_001171933<br>NM_001171934<br>NM_001171936<br>NM_052836 |
| 33 | DFNB15/72/95  | <i>GIPC3</i>    | NM_133261    | -                                                                                                         |
| 34 | DFNB16        | <i>STRC</i>     | NM_153700    | -                                                                                                         |
| 35 | DFNB18/USH1C  | <i>USH1C</i>    | NM_153676    | NM_005709                                                                                                 |
| 36 | DFNB22        | <i>OTOA</i>     | NM_144672    | NM_001161683<br>NM_170664                                                                                 |

|    |              |                 |              |                                                                                                                                                              |
|----|--------------|-----------------|--------------|--------------------------------------------------------------------------------------------------------------------------------------------------------------|
| 37 | DFNB23/USH1F | <i>PCDH15</i>   | NM_033056    | NM_001142763<br>NM_001142764<br>NM_001142765<br>NM_001142766<br>NM_001142767<br>NM_001142769<br>NM_001142770<br>NM_001142771<br>NM_001142772<br>NM_001142773 |
| 38 | DFNB24       | <i>RDX</i>      | NM_002906    | -                                                                                                                                                            |
| 39 | DFNB25       | <i>GRXCR1</i>   | NM_001080476 | -                                                                                                                                                            |
| 40 | DFNB28       | <i>TRIOBP</i>   | NM_007032    | NM_138632<br>NM_001039141                                                                                                                                    |
| 41 | DFNB29       | <i>CLDN14</i>   | NM_144492    | NM_001146077<br>NM_001146078<br>NM_001146079<br>NM_012130                                                                                                    |
| 42 | DFNB30       | <i>MYO3A</i>    | NM_017433    | -                                                                                                                                                            |
| 43 | DFNB31/USH2D | <i>WHRN</i>     | NM_015404    |                                                                                                                                                              |
| 44 | DFNB35       | <i>ESRRB</i>    | NM_004452    | -                                                                                                                                                            |
| 45 | DFNB36       | <i>ESPN</i>     | NM_031475    | -                                                                                                                                                            |
| 46 | DFNB39       | <i>HGF</i>      | NM_000601    | NM_001010931<br>NM_001010932<br>NM_001010933<br>NM_001010934                                                                                                 |
| 47 | DFNB42       | <i>ILDR1</i>    | NM_001199799 | NM_001199800<br>NM_175924                                                                                                                                    |
| 48 | DFNB49       | <i>MARVELD2</i> | NM_001038603 | NM_001244734                                                                                                                                                 |
| 49 | DFNB59       | <i>PJVK</i>     | NM_001042702 |                                                                                                                                                              |
| 50 | DFNB61       | <i>SLC26A5</i>  | NM_206883    | NM_001167962<br>NM_206884                                                                                                                                    |

|    |           |                |              |              |
|----|-----------|----------------|--------------|--------------|
|    |           |                |              | NM_206885    |
|    |           |                |              | NM_198999    |
| 51 | DFNB63    | <i>LRTOMT</i>  | NM_001145307 | NM_001145308 |
|    |           |                |              | NM_001205138 |
|    |           |                |              | NM_145309    |
| 52 | DFNB66/67 | <i>LHFPL5</i>  | NM_182548    | -            |
| 53 | DFNB74    | <i>MSRB3</i>   | NM_198080    | NM_001031679 |
|    |           |                |              | NM_001193460 |
|    |           |                |              | NM_001193461 |
| 54 | DFNB77    | <i>LOXHD1</i>  | NM_144612    | NM_001173129 |
|    |           |                |              | NM_001145472 |
|    |           |                |              | NM_001145473 |
| 55 | DFNB79    | <i>TPRN</i>    | NM_001128228 | -            |
| 56 | DFNB82    | <i>GPSM2</i>   | NM_013296    | -            |
| 57 | DFNB84    | <i>PTPRQ</i>   | NM_001145026 | -            |
| 58 | DFNB91    | <i>SERPIN6</i> | NM_004568    | NM_001195291 |

---
